# Supplementary material for: Consequences of increasing convection onto patient care and protein removal in hemodialysis
Source: PubMed Central journal article supplement (PMC5293266; doi:10.1371/journal.pone.0171179), 2017-02-06
Supplement: pone.0171179.s001.pdf [file pone.0171179.s001.pdf]

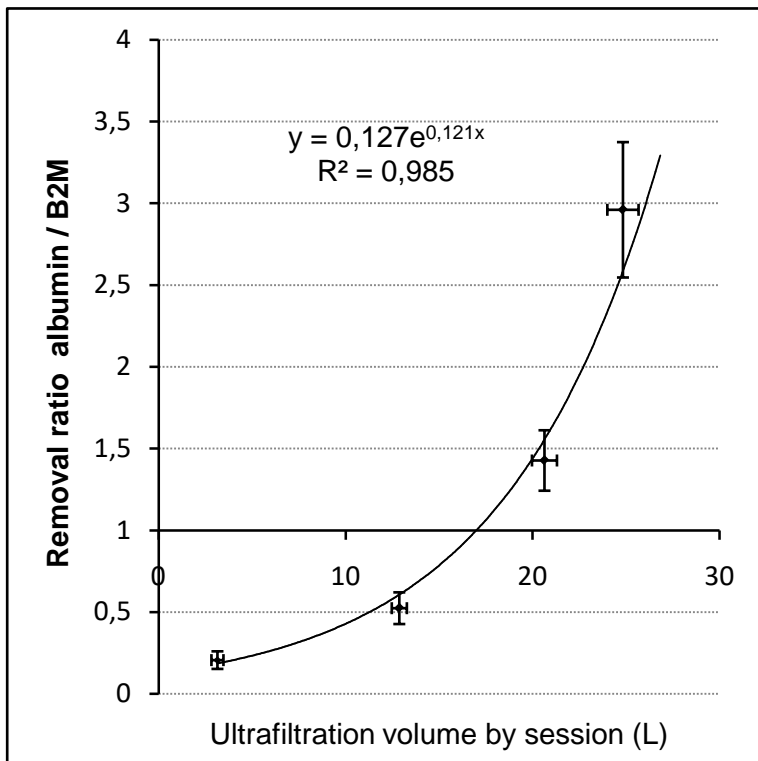

**S1 Fig**
